# Supplementary material
Source: Royal Society of Chemistry journal article supplement (doi:10.1039/d6cc02472f)
Supplement: d6cc02472f1.pdf [file d6cc02472f1.pdf]

## Electronic Supplementary Information

### **Interface Engineering in Crystalline/Amorphous Pd-Ru Heterostructures for Boosting Alkaline Hydrogen Oxidation Kinetics**

Jianmei Wang,<sup>a</sup> Xiaozhong Zheng,<sup>\*b</sup> Xinxin Shu,<sup>c</sup> Shun Li,<sup>a</sup> Jian Wu,<sup>a</sup> Cong Wang<sup>a</sup> and Lingzhi Kang<sup>a</sup>

<sup>a</sup>Institute of Ecology & Health, Hangzhou Polytechnic University, Hangzhou 310018, PR China.

<sup>b</sup>Department of Chemistry and Materials Science, Nanjing Forestry University, Nanjing 210037, China.

<sup>c</sup>School of Materials Science and Engineering, Zhejiang University, Hangzhou 310058, China.

Corresponding email: [chemzxz@njfu.edu.cn](mailto:chemzxz@njfu.edu.cn)

## Experimental Section

**Materials:** All the chemicals were used as received without further purification. Ruthenium acetylacetonate ( $\text{Ru}(\text{acac})_3$ ), Potassium tetrachloropalladate(II) ( $\text{K}_2\text{PdCl}_4$ , purity 99.99%) and Nafion solution (5 wt%) were purchased from Alfa Aesar China Co. Ltd. Potassium bromide (KBr), ethylene glycol (EG,  $\geq 99\%$ ), and ethanol (99.9%) were purchased from Sinopharm Chemical Reagent Co. Ltd. Potassium hydroxide (KOH, 90%) was purchased from Macklin. Carbon black (VulcanXC-72, purity 99.5%) was purchased from Alfa Aesar. Ultrapure deionized water (DIW) ( $18 \text{ M}\Omega \text{ cm}^{-1}$ ) was used in all the experiments.

### Synthesis of Ru Nanosheets

Ru NS were synthesized using a modified method based on the previous work. In a typical procedure, 24 mg  $\text{Ru}(\text{acac})_3$  and 45 mg KBr were dissolved into a mixture solution containing 18 mL ethanol and 3 mL DIW. The resulting solution was stirred magnetically in a water bath at  $50 \text{ }^\circ\text{C}$  until a dull red powder formed. The obtained powder was then calcined in a tube furnace at  $280 \text{ }^\circ\text{C}$  for 1.5 h with a heating rate of  $5 \text{ }^\circ\text{C min}^{-1}$  under an air atmosphere, followed by natural cooling to room temperature. The final product was washed several times with DIW and ethanol, collected by centrifugation, and freeze-dried.

### Synthesis of Pd cluster/Ru NS

A series of Pd cluster/Ru NS samples with different Pd/Ru ratios were synthesized using a polyol reduction method. Typically, 5 mg of Ru NS and 38 mg of  $\text{K}_2\text{PdCl}_4$  were dispersed in 20 mL of EG and sonicated for 2 min. The resulting suspension was then stirred vigorously (600 rpm) at  $80 \text{ }^\circ\text{C}$  for 3 h to obtain  $\text{Pd}_{4\%}$  cluster/Ru NS. The product was washed several times with DIW and ethanol, collected by centrifugation, and finally freeze-dried.  $\text{Pd}_{2\%}$  cluster/Ru NS and  $\text{Pd}_{10\%}$  cluster/Ru NS were prepared following the same procedure, using 15 mg and 100 mg of  $\text{K}_2\text{PdCl}_4$ , respectively. Here,  $\text{Pd}_{2\%}$  cluster/Ru NS,  $\text{Pd}_{4\%}$  cluster/Ru NS and  $\text{Pd}_{10\%}$  cluster/Ru NS correspond to nominal Pd/Ru mass ratios of approximately 2%, 4%, and 10%,

respectively. Unless otherwise stated, "Pd cluster/Ru NS" in this work refers to Pd<sub>4%</sub> cluster/Ru NS.

### **Synthesis of Pd/CB**

Pd/CB was also prepared via the polyol reduction method. In a typical procedure, 5 mg of carbon black (CB) and 50 mg of K<sub>2</sub>PdCl<sub>4</sub> were dispersed in 20 mL of EG and sonicated for 10 min. The mixture was then stirred vigorously (600 rpm) at 80 °C for 3 h to yield Pd/CB.

### **Material characterizations**

X-ray diffraction (XRD) analysis was performed on a Rigaku Dmax-rc diffractometer using Ni-filtered Cu K $\alpha$  radiation ( $\lambda = 1.5418 \text{ \AA}$ ). Transmission electron microscopy (TEM) and high-resolution transmission electron microscopy (HRTEM) images were acquired using an FEI Tecnai G2 F20 S-TWIN microscope operated at 200 kV to investigate the morphology and microstructure of the samples. X-ray photoelectron spectroscopy (XPS) measurements were conducted on a VG Scientific ESCALab220i-XL spectrometer with monochromatic Al K $\alpha$  radiation (500  $\mu\text{m}$  spot size). The base pressure in the analysis chamber was maintained at approximately  $3 \times 10^{-10}$  mbar. Inductively coupled plasma mass spectrometry (ICP-MS) was carried out on an ICAP-RQ instrument (ThermoFisher Scientific, Germany) to determine the elemental compositions of the samples.

### **Electrochemical measurements**

Electrochemical assessments were performed using a CHI 760E electrochemical workstation in a standard three-electrode cell. A glassy carbon electrode (GCE, 5 mm diameter) coated with the catalyst served as the working electrode, while a graphite rod and a Hg/HgO electrode were used as the counter and reference electrodes, respectively. The catalyst ink was prepared by dispersing a specific amount of catalysts in a 0.5 mL solution of isopropanol/H<sub>2</sub>O (3/1) containing 5  $\mu\text{L}$  of 5% Nafion solution. Subsequently, 10  $\mu\text{L}$  of the electrocatalyst ink was applied to the GCE surface to maintain a low noble metal loading of 10  $\mu\text{g cm}^{-2}$ . HOR assessments were performed in H<sub>2</sub>-saturated 0.1 M KOH solution. The tests were conducted at

a scanning rate of 2 mV s<sup>-1</sup> with a rotating speed of 1600 rpm, unless specific noted.

The kinetic current ( $j_K$ ) was calculated based on the Koutecky–Levich equation:

$$1/j = 1/j_K + 1/j_D \quad (1)$$

where  $j$  stands for the measured current and  $j_D$  represents the diffusion current.

The specific exchange current density ( $j_o$ ) was obtained by fitting  $j_K$  with Butler-Volmer equation:

$$j_K = j_o [\exp(\alpha F \eta / RT) - \exp[-(1-\alpha) F \eta / RT]] \quad (2)$$

where  $\alpha$  is the charge transfer coefficient,  $R$  is the universal gas constant (8.314 J mol<sup>-1</sup> K<sup>-1</sup>), and  $T$  is the temperature (K),  $\alpha$  and  $j_o$  were set as variables.

### **ECSA tests**

Cu underpotential deposition (Cu-UPD) measurements were conducted to determine the electrochemically active surface area (ECSA). The Pd/C and Ru-based electrodes were polarized at the Cu-UPD potential for 100 s in an Ar-purged 0.5 M H<sub>2</sub>SO<sub>4</sub> solution containing 5 mM CuCl<sub>2</sub> to achieve monolayer Cu deposition. Subsequently, Cu-UPD stripping voltammetry was carried out in CuCl<sub>2</sub>-free 0.5 M H<sub>2</sub>SO<sub>4</sub> at a scan rate of 10 mV s<sup>-1</sup>. The voltammogram collected in CuCl<sub>2</sub>-free electrolyte without Cu deposition was used as the background. The ECSA was evaluated from the integral area of Cu-UPD peaks ( $Q_{Cu}$ ) with the subtraction of the background and a charge density of 420 μC cm<sup>-2</sup> ( $Q_s$ ):

$$\text{ECSA (m}^2_{\text{metal}}/\text{g}_{\text{metal}}) = Q_{Cu} / (M_{\text{metal}} * Q_s)$$

where  $M_{\text{metal}}$  is the metal mass loading on a certain geometric area of the working electrode.

### **Computational details for calculations**

Density functional theory (DFT) calculations in this study were conducted using Vienna ab-initio simulation package (VASP) with the Perdew-Burke-Ernzerhof (PBE) function for potential exchange-correlation. The projector augmented wave pseudopotentials method was employed to describe electron-ion interactions. A cut-off energy of 400 eV was used. The Gaussian smearing with a width of 0.05 eV was adopted around the Fermi surface. A vacuum

of 15 Å was included along the z-axis. Electronic structure calculations employed a  $(5 \times 5 \times 1)$  Monkhoest–Pack k-point mesh, while structure optimization used a  $(2 \times 2 \times 1)$  mesh. Geometry optimization was initiated when the forces reached a convergence criterion of less than 0.02 eV Å<sup>-1</sup>, and the energy difference was below 10<sup>-4</sup> eV. For Pd cluster/Ru NS and Pd/CB catalysts, the slab model was constructed by 8 Pd atoms supported on amorphous Ru substrate or monolayer graphene. During slab calculations, all atoms were allowed to relax. To obtain the thermodynamically stable amorphous Ru configuration, a constant-size NVT ensemble was utilized for AIMD (ab initio molecular dynamics) with an analog anneal-to-quench procedure starting at 1273.15 down to 298.15 K with total 45 Ru atoms. The total simulation time was 5 ps with a time step of 1 fs, and 5 000 steps were done to acquire the amorphous structure. When the simulation ended, additional geometry optimizations were carried out to obtain the stabilized amorphous structure.

The d-band center value ( $E_d$ ) was determined by using  $E_d = \frac{\int_{-\infty}^{\infty} N_d(\varepsilon)\varepsilon d\varepsilon}{\int_{-\infty}^{\infty} N_d(\varepsilon) d\varepsilon}$ , where  $\varepsilon$  is the energy referring to Fermi level and  $N_d(\varepsilon)$  is density of states (DOS) projected onto d-states or different orbits of d-states.

The charge accumulation and depletion were obtained as  $\rho_{\text{difference}} = \rho_{\text{Pd/Ru}^-} - (\rho_{\text{Pd}^+} + \rho_{\text{Ru}})$ , where  $\rho$  represents the charge density. The adsorption energy ( $E_{\text{ads}}$ ) of OH\* and H\* is calculated by  $E_{\text{ads}} = E(\text{X/slab}) - E(\text{X}) - E(\text{slab})$ , where X is adsorbate and slab is the model. The thermodynamic free energies (G) were calculated using the equation  $G = E_{\text{DFT}} + E_{\text{ZPE}} - TS$ , where  $E_{\text{DFT}}$  represents the DFT ground state,  $E_{\text{ZPE}}$  stands for zero-point energy, and S corresponds to entropy.

## Figures and Tables

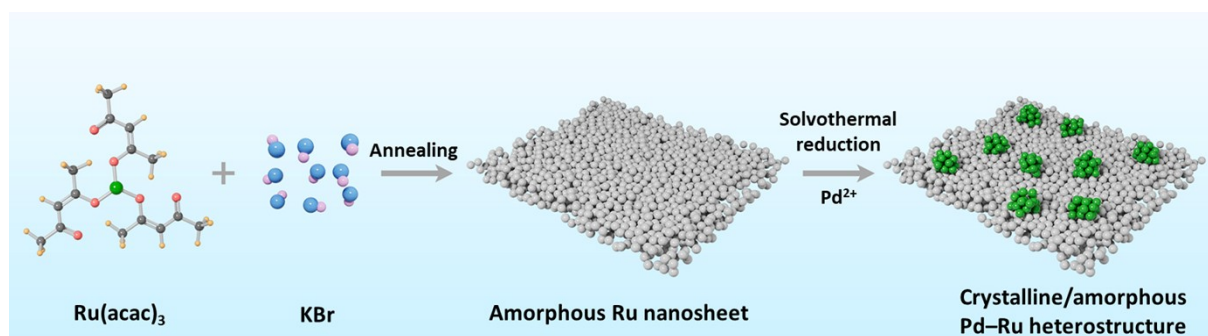

**Fig. S1.** Schematic illustration of the synthetic process for Pd cluster/Ru NS.

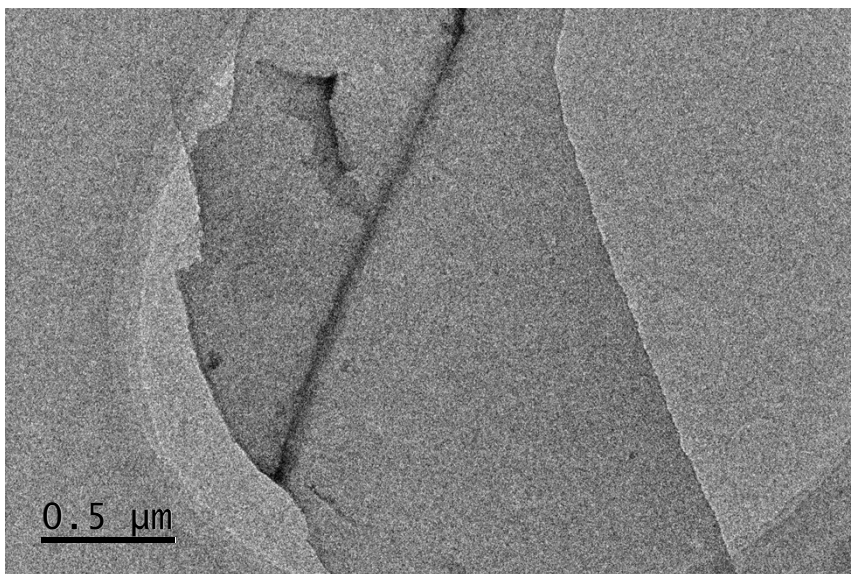

**Fig. S2.** TEM image of Ru NS.

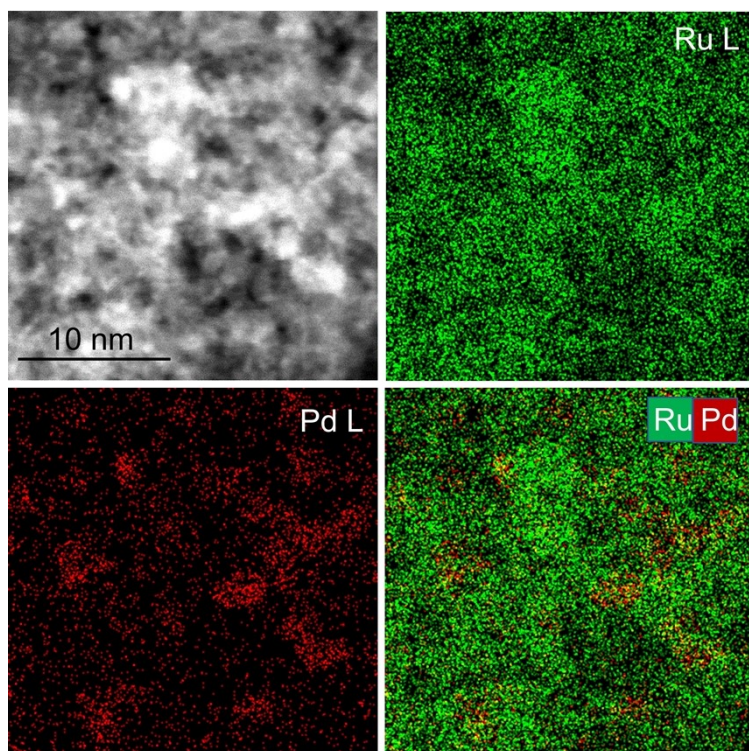

**Fig. S3.** EDS element mapping images of Pd cluster/Ru NS.

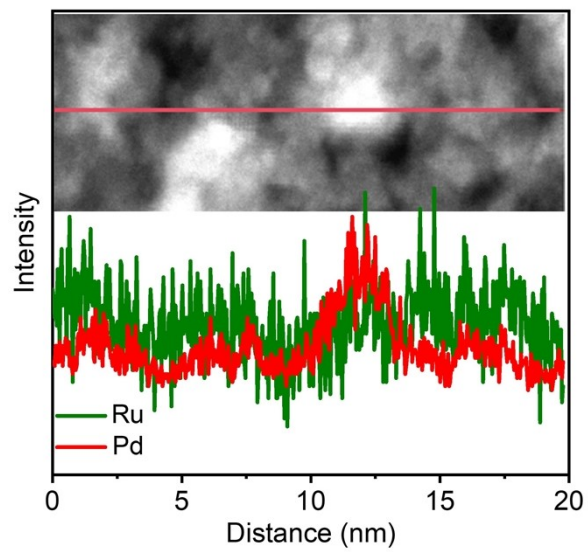

**Fig. S4.** EDS line-scanning profiles across the Pd cluster/Ru NS.

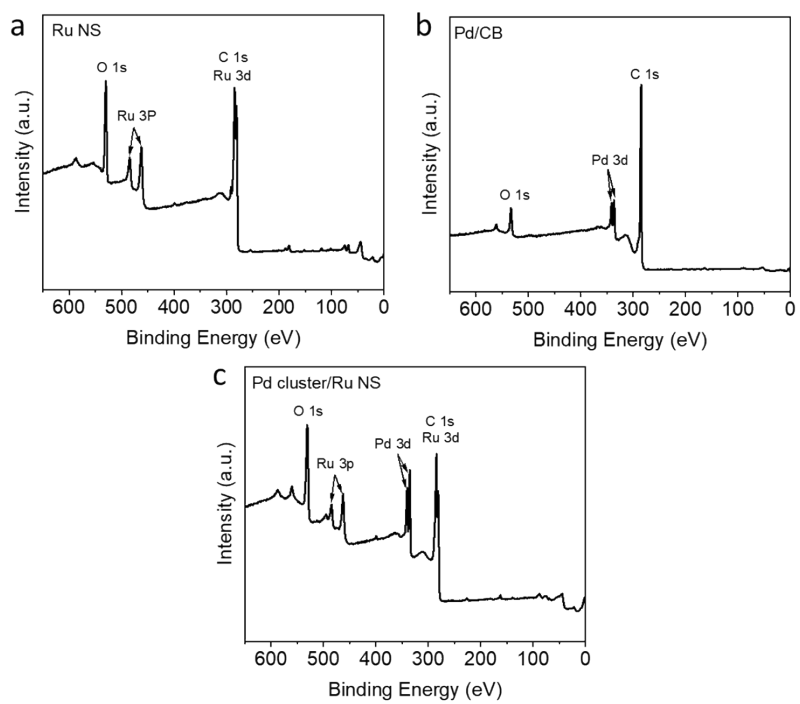

**Fig. S5.** XPS survey spectra of (a) Ru NS, (b) Pd/CB and (c) Pd cluster/Ru NS samples.

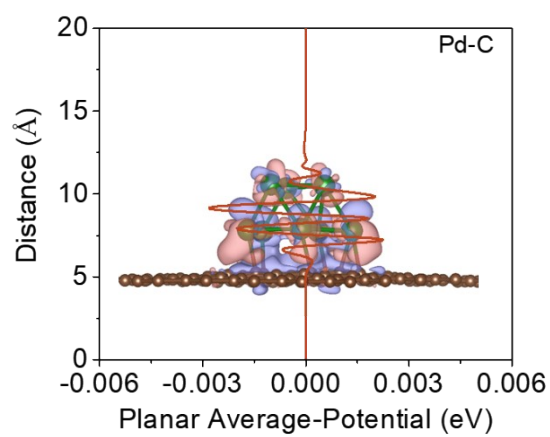

**Fig. S6.** Planar average potential of Pd<sub>8</sub>/C model along the Z-direction. The insert is charge density difference, where the red region reflects an electron-deficient state while the bright blue region reflects an electron-rich area, with an isovalue of 0.005 e/Å<sup>3</sup>.

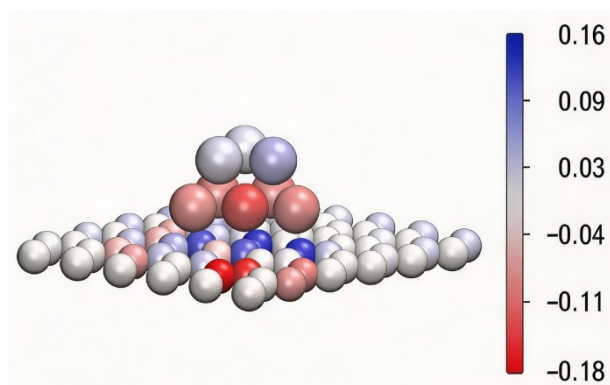

**Fig. S7.** The bader charge distribution of Pd<sub>8</sub>/C model.

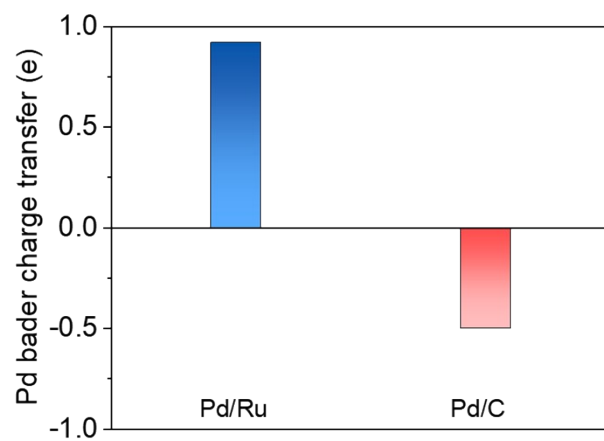

**Fig. S8.** Pd bader charge transfer in Pd<sub>8</sub>/Ru and Pd<sub>8</sub>/C.

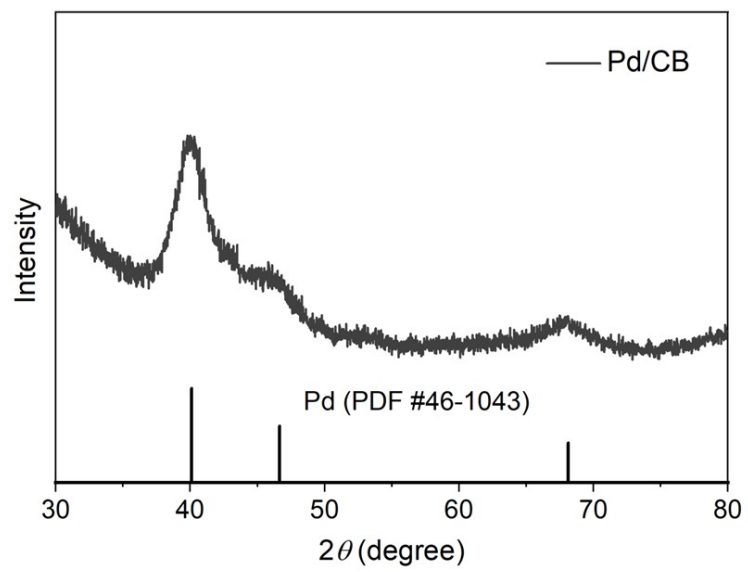

**Fig. S9.** XRD spectra of Pd/CB.

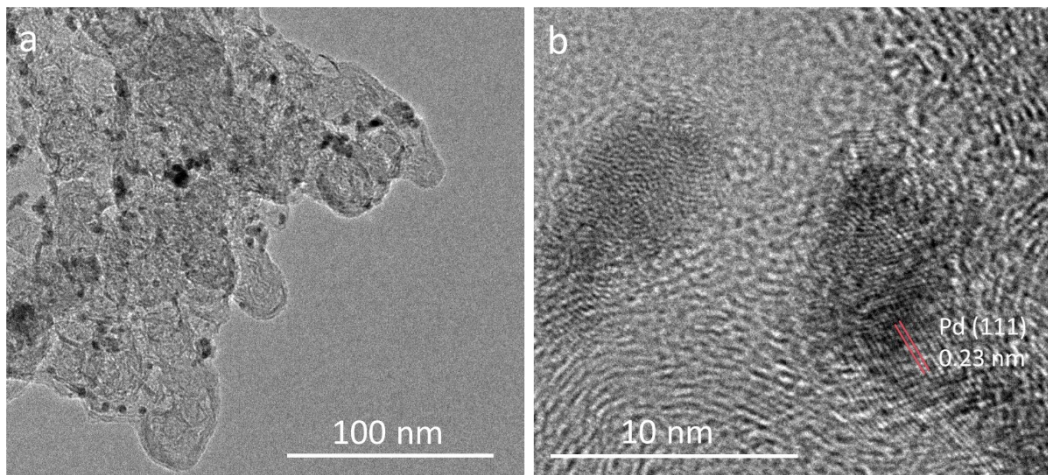

**Fig. S10.** (a) TEM image of Pd/CB. (b) HRTEM image of Pd/CB.

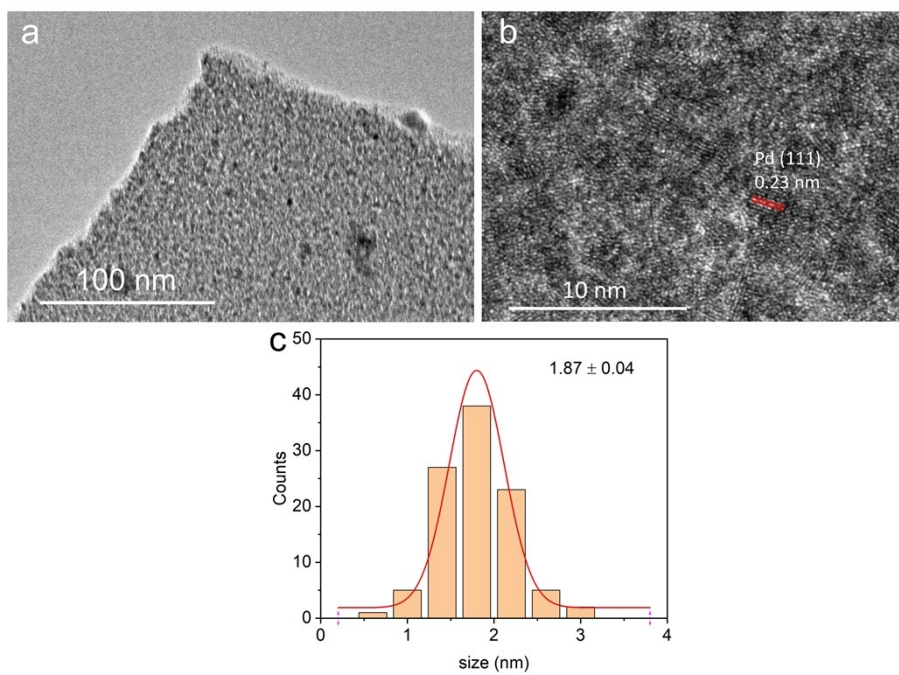

**Fig. S11.** TEM (a) and HRTEM (b) images of Pd<sub>2%</sub> cluster/Ru NS. (c) The size distribution histogram of the Pd clusters in the Pd<sub>2%</sub> cluster/Ru NS samples.

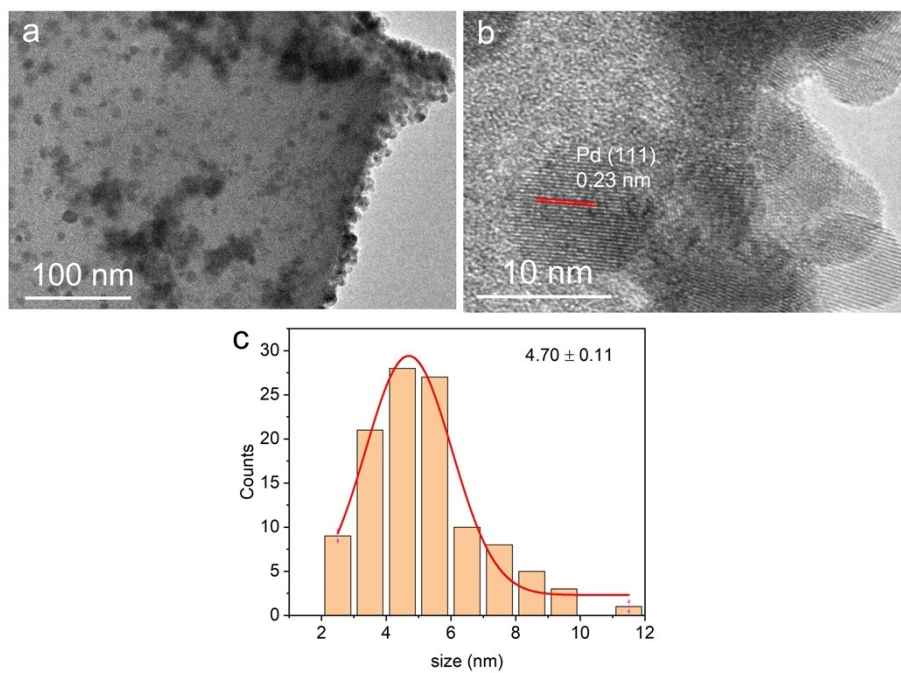

**Fig. S12.** TEM (a) and HRTEM (b) images of Pd<sub>10%</sub> cluster/Ru NS. (c) The size distribution histogram of the Pd clusters in the Pd<sub>10%</sub> cluster/Ru NS samples.

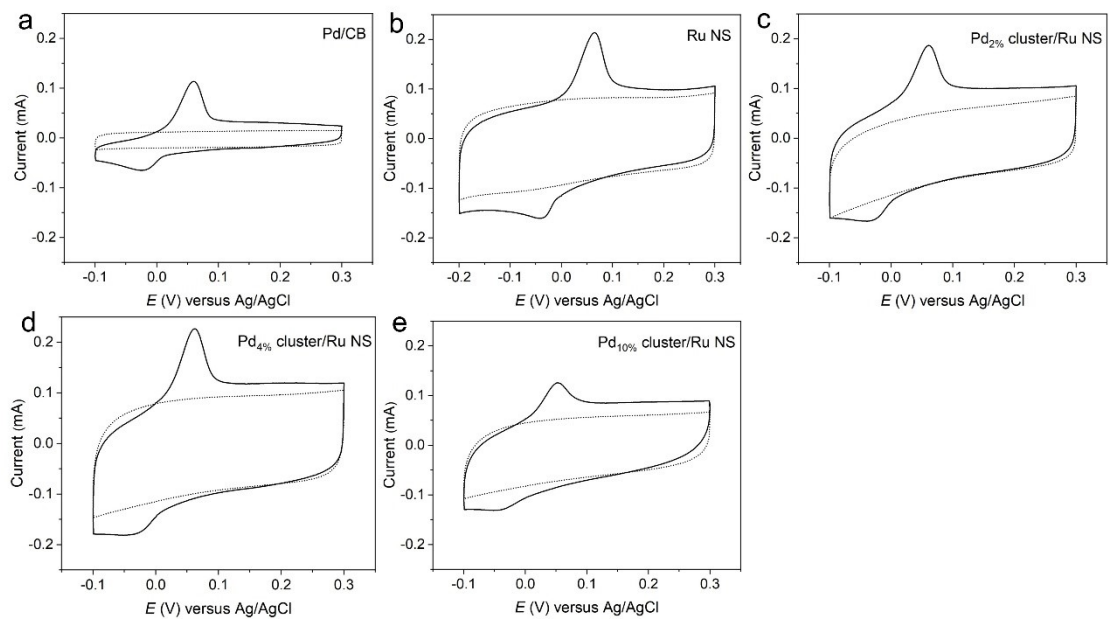

**Fig. S13.** Estimation of the ECSA using the copper underpotential deposition (Cu-UPD) method for Pd/CB (a), Ru NS (b), Pd<sub>2%</sub> cluster/Ru NS (c), Pd<sub>4%</sub> cluster/Ru NS (d) and Pd<sub>10%</sub> cluster/Ru NS (e).

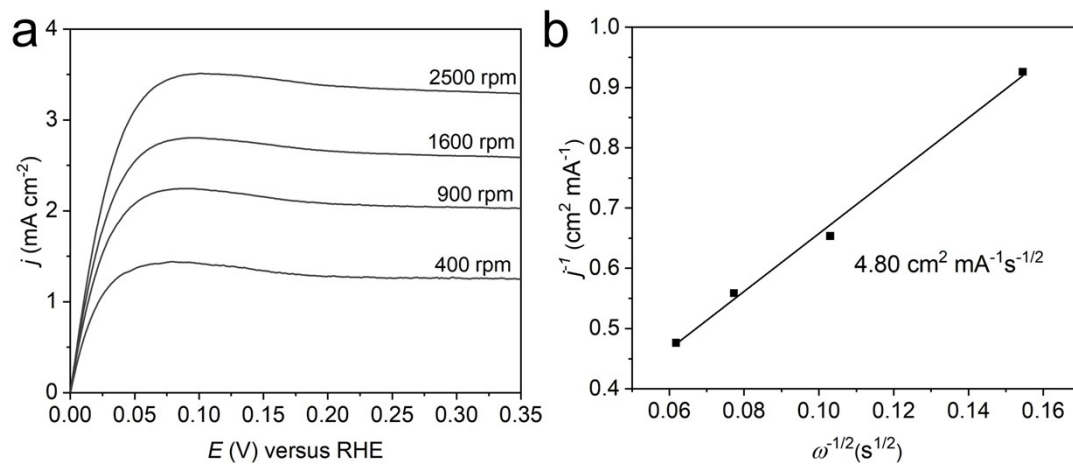

**Fig. S14.** (a) HOR polarization curves of Pd cluster/Ru NS sample at different rotation speeds. (b) The Koutecky-Levich plot of Pd cluster/Ru NS at an overpotential of 25 mV derived from Fig. S14a.

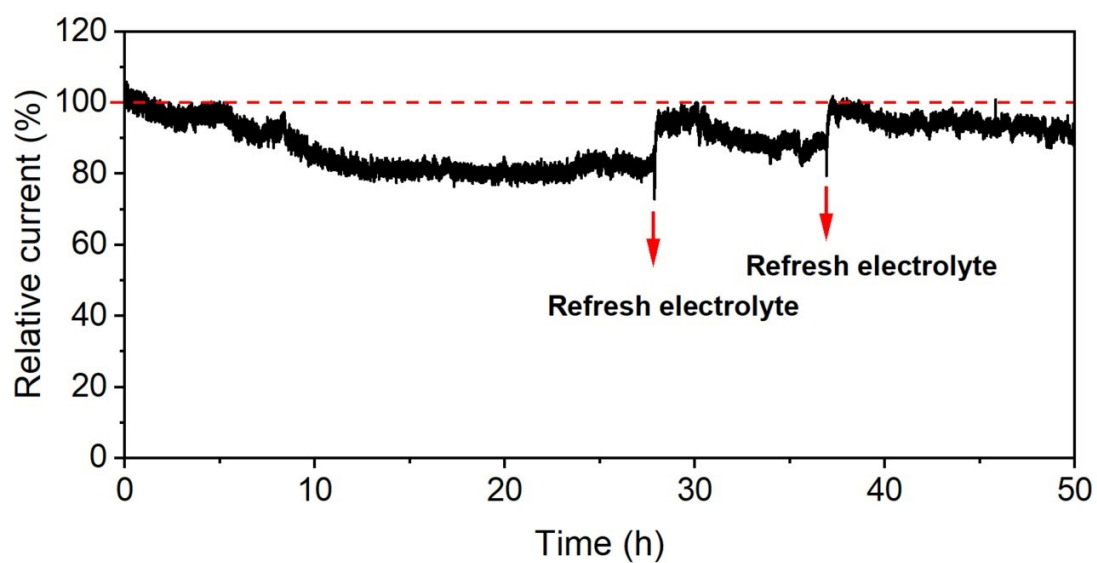

**Fig. S15.** Relative current–time chronoamperometric response of the Pd cluster/Ru NS catalyst supported on carbon fiber paper with a precious metal loading of  $100 \mu\text{g cm}^{-2}$  at an overpotential of 100 mV in 0.1 M KOH solution.

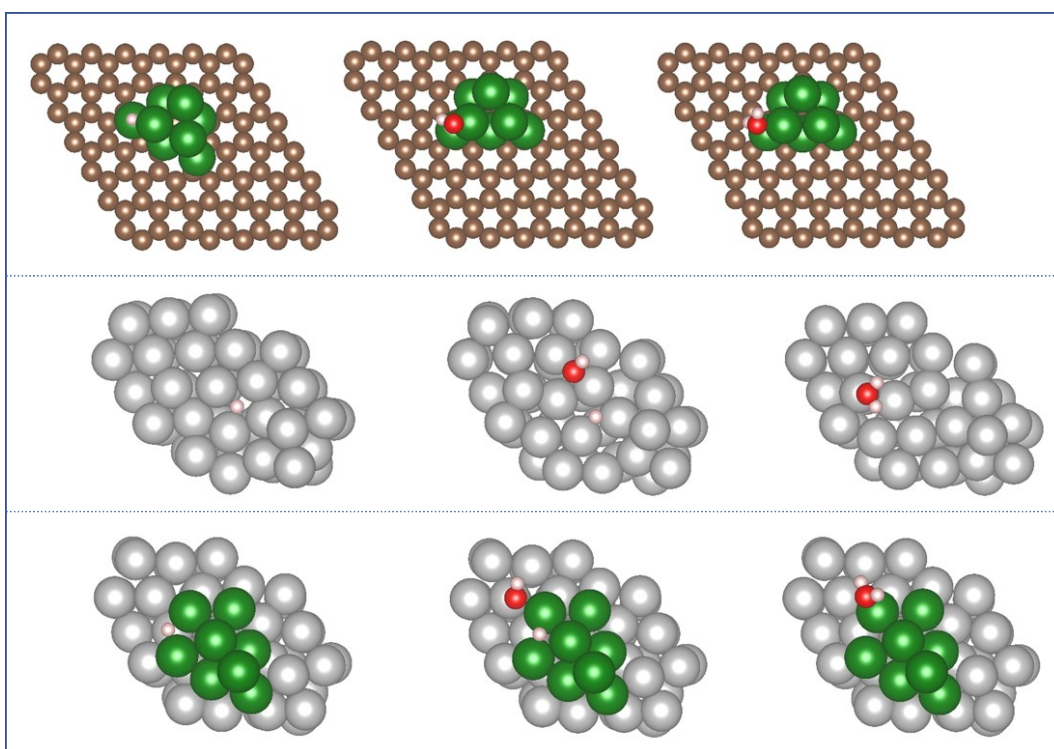

**Fig. S16.** TOP view of the atomic configurations of different models.

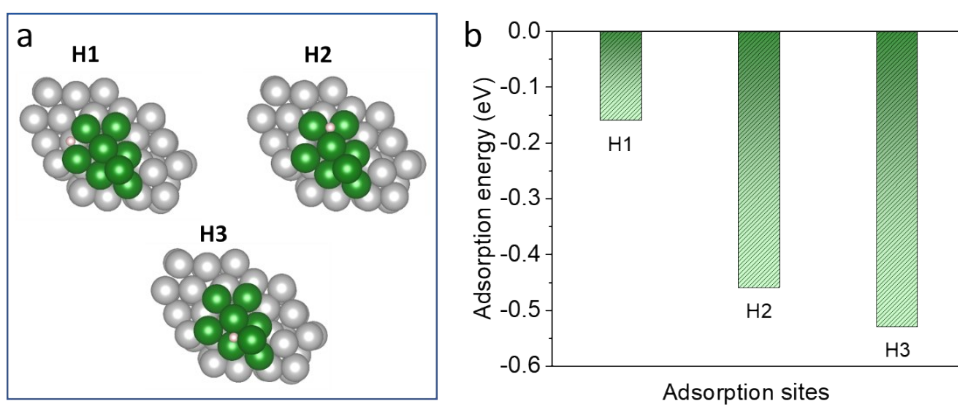

**Fig. S17.** (a) Different adsorption sites of H\* on the model of Pd/Ru. (b) Adsorption energy of H\* on different adsorption sites illustrated in (a).

**Table S1.** Chemical compositions of different sample catalysts determined by ICP-OES.

| Sample                          | Pd (wt%) | Ru (wt%) |
|---------------------------------|----------|----------|
| Ru NS                           | -        | 68.47    |
| Pd/CB                           | 5.74     | -        |
| Pd <sub>2%</sub> cluster/Ru NS  | 1.35     | 68.31    |
| Pd <sub>4%</sub> cluster/Ru NS  | 2.79     | 67.12    |
| Pd <sub>10%</sub> cluster/Ru NS | 6.23     | 63.59    |

**Table S2.** Alkaline HOR performance comparison of the electrocatalysts applied in this study.

| Catalyst                            | ECSA<br>(m <sup>2</sup> g <sup>-1</sup> ) | Loading<br>(μg cm <sup>-2</sup> ) | $j_k@30$ mV<br>(mA cm <sub>ECSA</sub> <sup>-2</sup> ) | $j_o$ (mA<br>cm <sub>GEO</sub> <sup>-2</sup> ) | $j_o$ (mA<br>cm <sub>ECSA</sub> <sup>-2</sup> ) | $j_o$ (A<br>mg <sub>PGM</sub> <sup>-1</sup> ) |
|-------------------------------------|-------------------------------------------|-----------------------------------|-------------------------------------------------------|------------------------------------------------|-------------------------------------------------|-----------------------------------------------|
| Ru NS                               | 92.8                                      | 10                                | 0.352                                                 | 2.25                                           | 0.243                                           | 1.15                                          |
| Pd/CB                               | 55.4                                      | 10                                | 0.009                                                 | 0.05                                           | 0.009                                           | 0.03                                          |
| Pd <sub>2%</sub> cluster<br>/Ru NS  | 61.7                                      | 10                                | 0.435                                                 | 2.74                                           | 0.444                                           | 1.40                                          |
| Pd <sub>4%</sub> cluster<br>/Ru NS  | 73.7                                      | 10                                | 0.982                                                 | 5.47                                           | 0.744                                           | 2.79                                          |
| Pd <sub>10%</sub> cluster<br>/Ru NS | 40.1                                      | 10                                | 0.579                                                 | 1.76                                           | 0.438                                           | 0.90                                          |

**Table S3.** Comparison of HOR activity with previous reported Ru-based catalysts in 0.1 M KOH.

| Electrode modification                                 | $j_o$ (mA cm <sup>-2</sup> ) | $j_{k,m}@50$ mV (A mg <sub>PGM</sub> <sup>-1</sup> ) | Ref.      |
|--------------------------------------------------------|------------------------------|------------------------------------------------------|-----------|
| Ru colloidosomes                                       | 2.86                         | /                                                    | 1         |
| Co <sub>1</sub> Ru <sub>1,n</sub> /rGO                 | 0.68                         | 7.68                                                 | 2         |
| RuNi/NC                                                | 2.69                         | /                                                    | 3         |
| Mn <sub>1</sub> O <sub>x</sub> (OH) <sub>y</sub> @Ru/C | 2.05                         | /                                                    | 4         |
| Ru@C                                                   | 3.48                         | /                                                    | 5         |
| Ru-Ru <sub>2</sub> P/C                                 | /                            | 1.265                                                | 6         |
| Ru-B-C-350                                             | /                            | 0.88                                                 | 7         |
| Ruc/NHCS                                               | 1.74                         | 1.95                                                 | 8         |
| Ru-TiO <sub>2</sub> -450                               | 5.92                         | 1.529                                                | 9         |
| Ru NAs with fcc phase                                  | 8.16                         | 2.75                                                 | 10        |
| Pd cluster/Ru NS                                       | 5.47                         | 2.76                                                 | This work |

Co<sub>1</sub>Ru<sub>1,n</sub>/rGO: symmetry structure of Ru nanoparticles by embedding cobalt (Co) single atoms on reduced graphene oxide;

RuNi/NC: Ru-Ni diatomic sites supported on N-doped porous carbon;

Mn<sub>1</sub>O<sub>x</sub>(OH)<sub>y</sub>@Ru/C: Mn<sub>1</sub>O<sub>x</sub>(OH)<sub>y</sub> clusters-modified Ru nanoparticles;

Ru@C: defective-carbon-supported Ru catalyst;

Ru-B-C-350: Borophene-Confined Ru Clusters;

Ruc/NHCS: Ru clusters supported on nitrogen-doped hollow carbon spheres;

Ru NAs: Ru nanosheet assemblies.

## References

- 1 X. Yang, B. Ouyang, P. Shen, Y. Sun, Y. Yang, Y. Gao, E. Kan, C. Li, K. Xu and Y. Xie, *J. Am. Chem. Soc.*, 2022, **144**, 11138–11147.
- 2 X. Q. Mu, S. L. Liu, M. Y. Zhang, Z. C. Zhuang, D. Chen, Y. R. Liao, H. Y. Zhao, S. C. Mu, D. S. Wang and Z. H. Dai, *Angew. Chem. Int. Ed.*, 2024, **63**, e202319618.
- 3 L. Han, P. Ou, W. Liu, X. Wang, H. T. Wang, R. Zhang, C. W. Pao, X. Liu, W. F. Pong, J. Song, Z. Zhuang, M. V. Mirkin, J. Luo and H. L. Xin, *Sci. Adv.*, 2022, **8**, eabm3779.
- 4 H. Shi, Y. Yang, P. Meng, J. Yang, W. Zheng, P. Wang, Y. Zhang, X. Chen, Z. Cheng, C. Zong, D. Wang and Q. Chen, *J. Am. Chem. Soc.*, 2024, **146**, 16619–16629.
- 5 Z. Yang, W. Lai, B. He, J. Wang, F. Yu, Q. Liu, M. Liu, S. Zhang, W. Ding, Z. Lin and H. Huang, *Adv. Energy Mater.*, 2023, **13**, 2300881.
- 6 L. Su, Y. Jin, D. Gong, X. Ge, W. Zhang, X. Fan and W. Luo, *Angew. Chem. Int. Ed.*, 2023, **62**, e202215585.
- 7 M. Wang, J. Liu, N. Sun, L. Wang, Z. Lou, X. Cui and L. Jiang, *Adv. Funct. Mater.*, 2026, **36**, e14712.
- 8 G. Meng, H. Cao, T. Wei, Q. Liu, J. Fu, S. Zhang, J. Luo and X. Liu, *Chem. Commun.*, 2022, **58**, 11839–11842.
- 9 X. Jin, X. Zhang, B. Yang, X. Zheng, M. Gao, H. Pan and W. Sun, *J. Mater. Chem. A*, 2025, **13**, 20404–20411.
- 10 J. Zhang, M. Cao, X. Li, Y. Xu, W. Zhao, L. Chen, Y. C. Chang, C. W. Pao, Z. Hu and X. Huang, *Small*, 2023, **19**, 2207038.
